# Supplementary material
Source: PubMed Central journal article supplement (PMC3060301)
Supplement: NIHMS277684-supplement-1_si_001.pdf [file NIHMS277684-supplement-1_si_001.pdf]

## Supporting Information

# Fluoride-Mediated Capture of a Noncovalent Bound State of a Reversible Covalent Enzyme Inhibitor: X-ray Crystallographic Analysis of an Exceptionally Potent $\alpha$ -Ketoheterocycle Inhibitor of Fatty Acid Amide Hydrolase

Mauro Mileni, Joie Garfinkle, Cyrine Ezzili, Benjamin F. Cravatt, Raymond C. Stevens,\* and Dale L. Boger\*

*Departments of Chemistry, Chemical Physiology, Molecular Biology and The Skaggs Institute for Chemical Biology, The Scripps Research Institute, 10550 North Torrey Pines Road, La Jolla, California 92037*

Full citation listings:

17. (a) Ahn, K.; Johnson, D. S.; Mileni, M.; Beidler, D.; Long, J. Z.; McKinney, M. K.; Weerapana, E.; Sadagopan, N.; Liimatta, M.; Smith, S. E.; Lazerwith, S.; Stiff, C.; Kamtekar, S.; Bhattacharya, K.; Zhang, Y.; Swaney, S.; Van Becelaere, K.; Stevens, R. C.; Cravatt, B. F. *Chem. Biol.* **2009**, *16*, 411–420.

25. (c) Keith, J. M.; Apodaca, R.; Xiao, W.; Seierstad, M.; Pattabiraman, K.; Wu, J.; Webb, M.; Karbarz, M. J.; Brown, S.; Wilson, S.; Scott, B.; Tham, C.-S.; Luo, L.; Palmer, J.; Wennerholm, M.; Chaplan, S.; Breitenbucher, J. G. *Bioorg. Med. Chem. Lett.* **2008**, *18*, 4838–4843.

31. (e) Hart, T.; Macias, A. T.; Benwell, K.; Brooks, T.; D'Alessandro, J.; Dokurno, P.; Francis, G.; Gibbons, B.; Haymes, T.; Kennett, G.; Lightowler, S.; Mansell, H.; Matassova, N.; Misra, A.; Padfield, A.; Parsons, R.; Pratt, R.; Robertson, A.; Walls, S.; Wong, M.; Roughley, S. *Bioorg. Med. Chem. Lett.* **2009**, *19*, 4241–4244.
